# Supplementary material
Source: PubMed Central journal article supplement (PMC3692349)
Supplement: NIHMS202561-supplement-Suppl_1.pdf [file NIHMS202561-supplement-Suppl_1.pdf]

**Supplementary Figures to Sofi et al. “A meta-analysis of potential risks of low levels of protein Z for diseases related to vascular thrombosis“ (Thromb Haemost 2010; 103.3)**

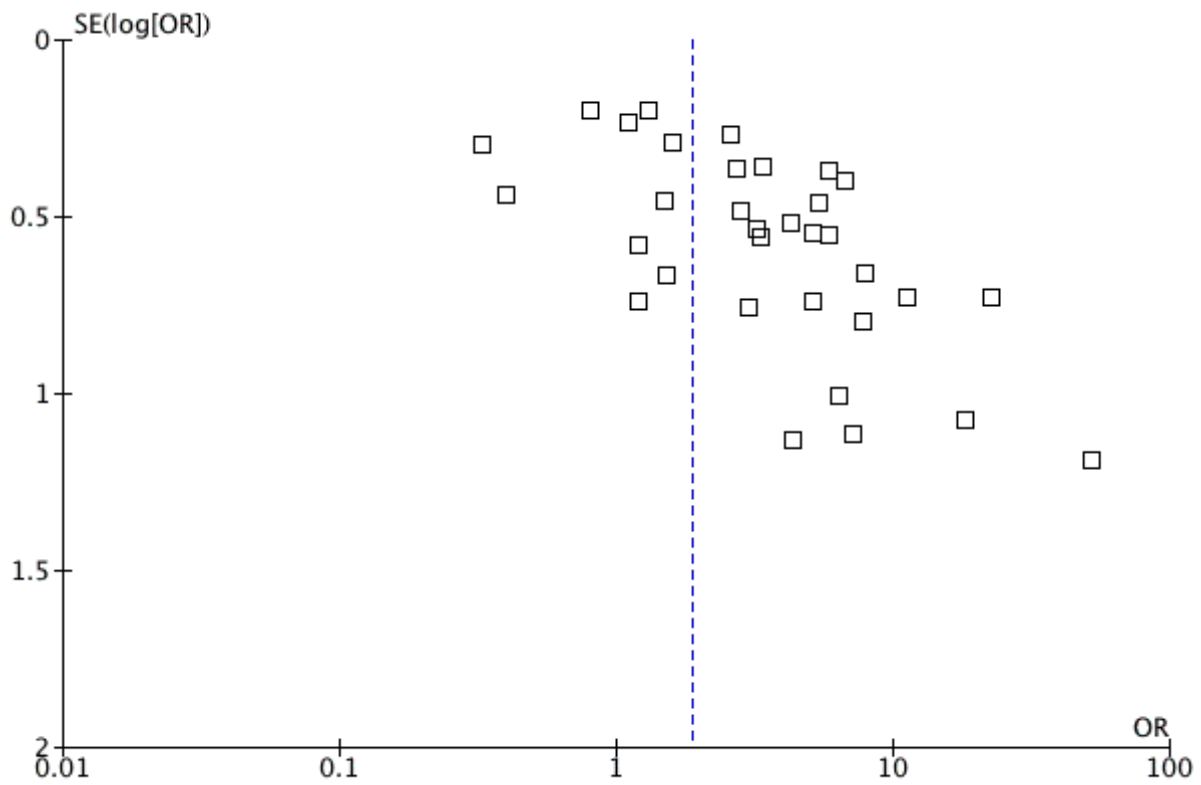

**S. Figure 1.** Funnel plot for studies investigating low protein Z levels in relation to vascular thrombotic diseases

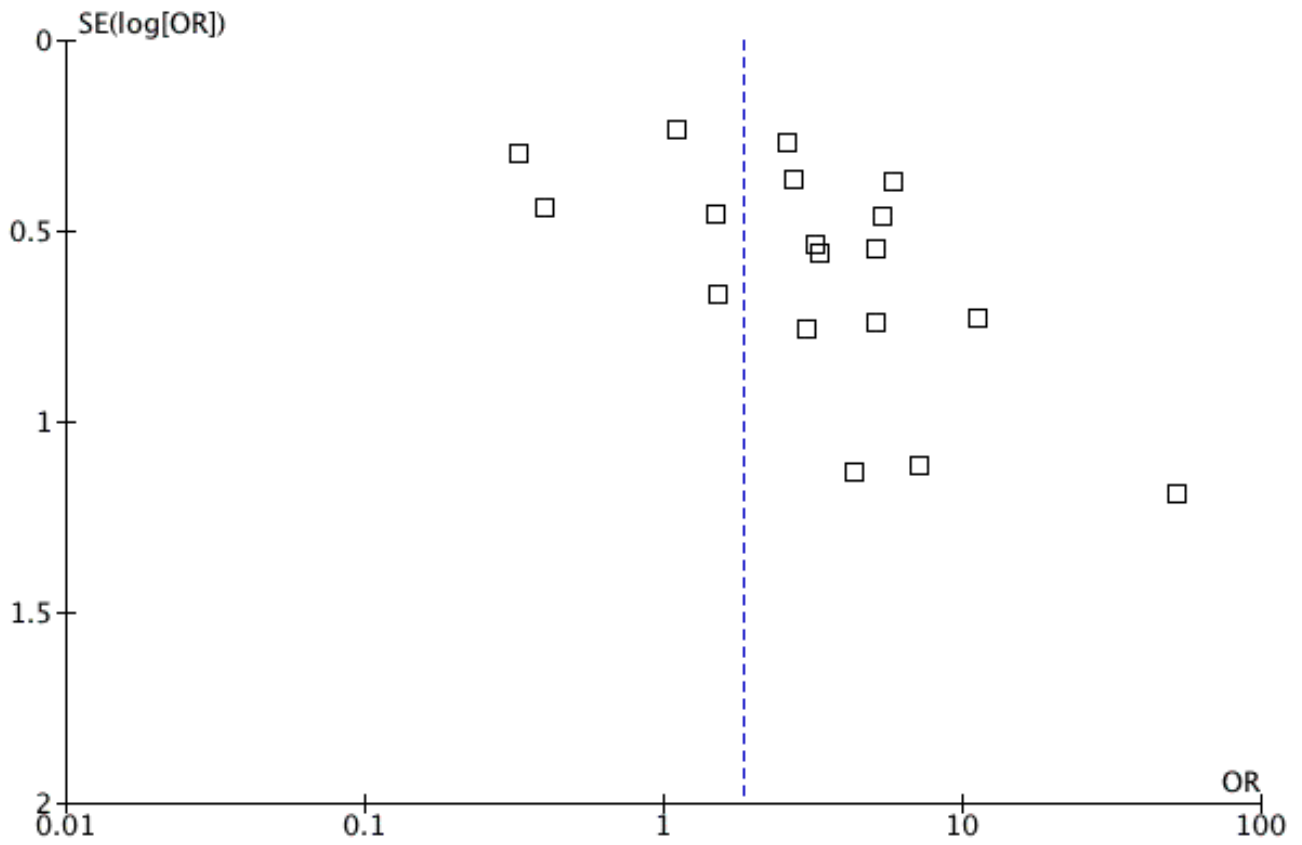

**S. Figure 2.** Funnel plot for studies investigating low protein Z levels in relation to arterial vascular diseases

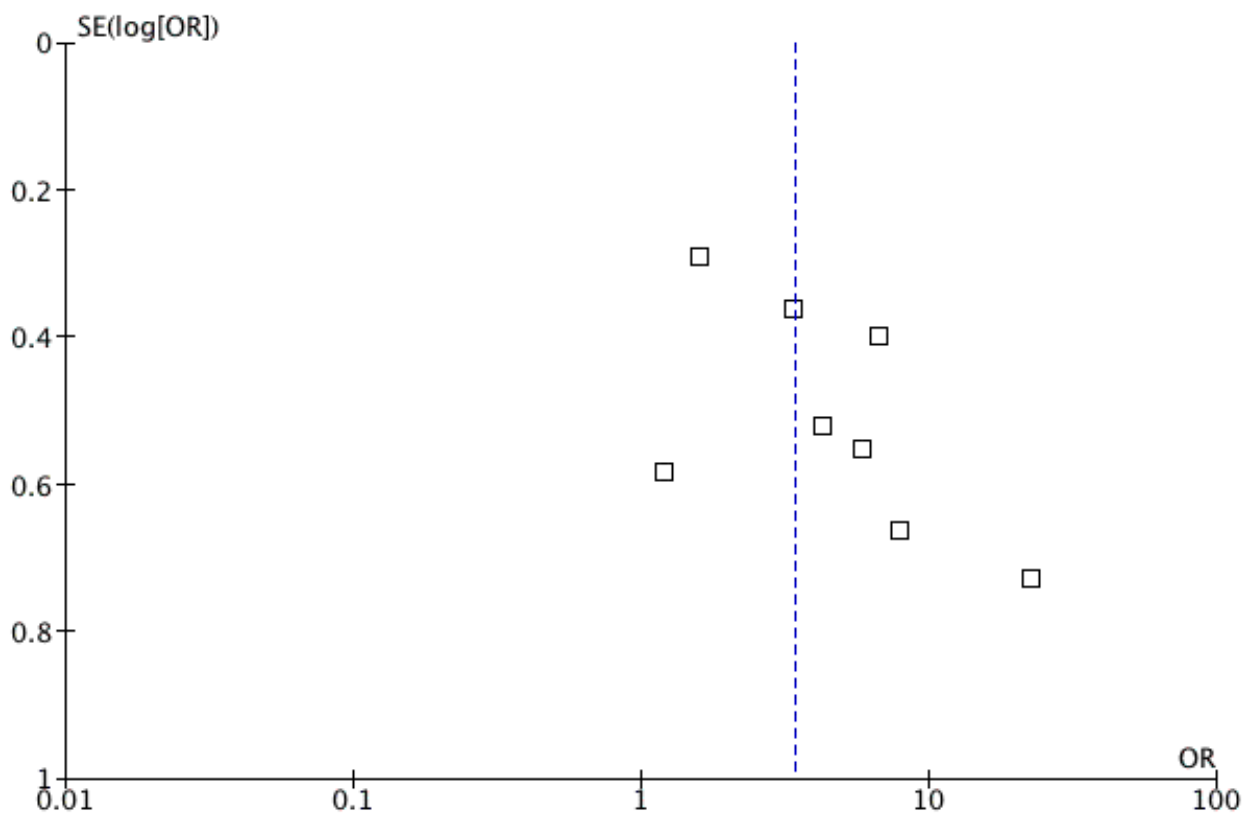

**S. Figure 3.** Funnel plot for studies investigating low protein Z levels in relation to pregnancy complications

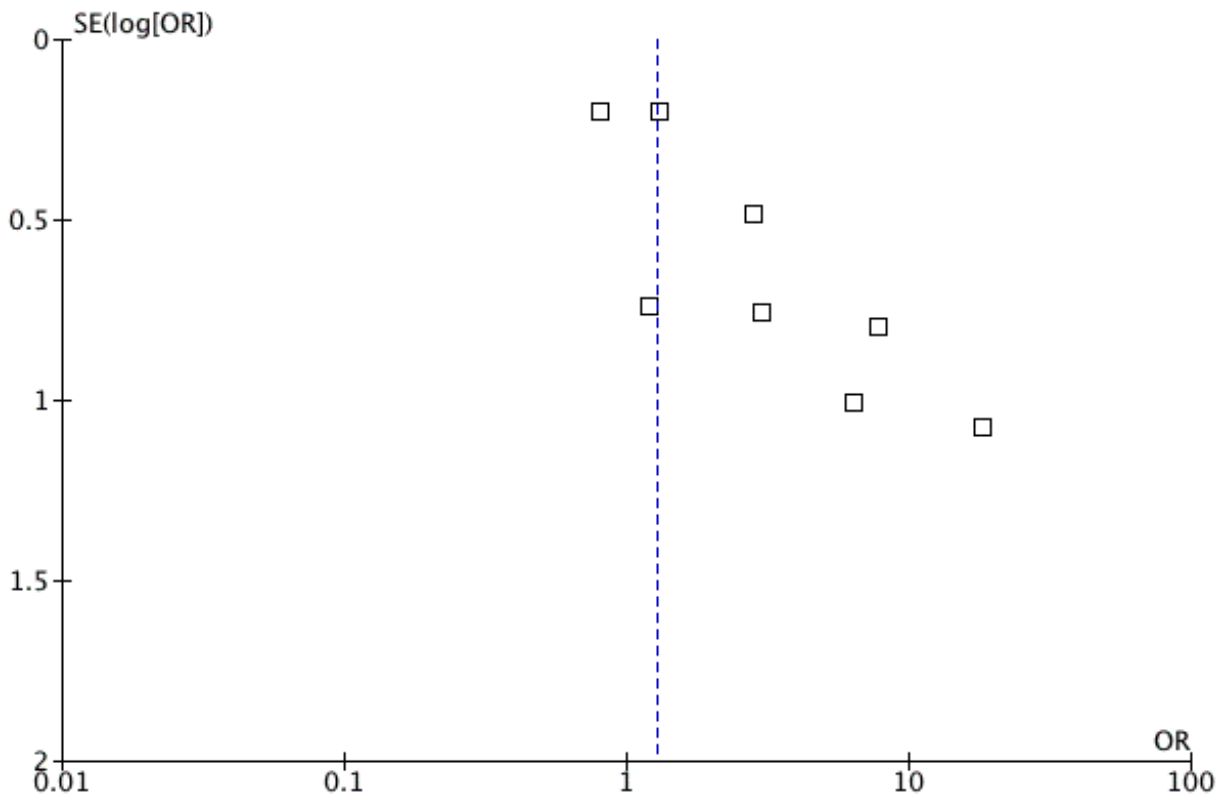

**S. Figure 4.** Funnel plot for studies investigating low protein Z levels in relation to venous thromboembolic diseases
